# Supplementary material for: Targeting lncRNA H19/miR-29b/COL1A1 Axis Impedes Myofibroblast Activities of Precancerous Oral Submucous Fibrosis
Source: PubMed Central journal article supplement (PMC7926971; doi:10.3390/ijms22042216), 2021-02-23
Supplement: ijms-22-02216-s001.pdf [file ijms-22-02216-s001.pdf]

**Supplementary Figure** The relative level of indicated protein expression was normalized against GAPDH and the control was set as 100%. Optical density values represent the mean  $\pm$  SD. Data shown here are the mean $\pm$ SD of three independent experiments.

**Suppl. Figure 1**

**A**

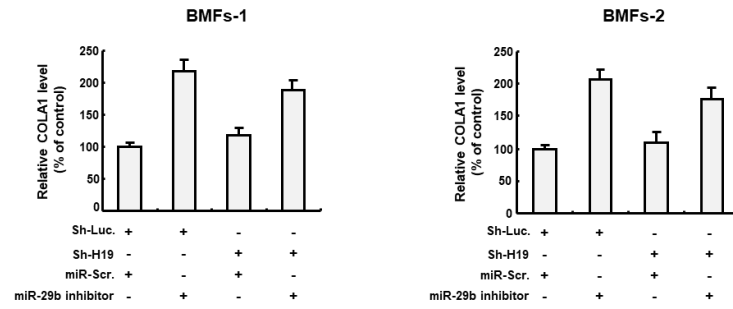

**B**

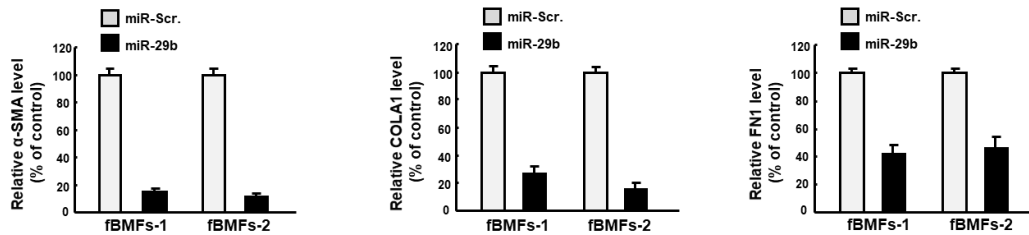

**Suppl. Figure 2**

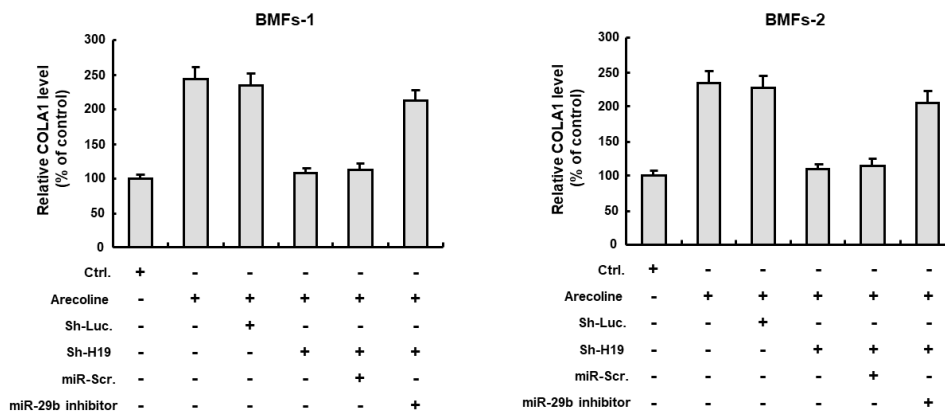

Suppl. Fig. 3

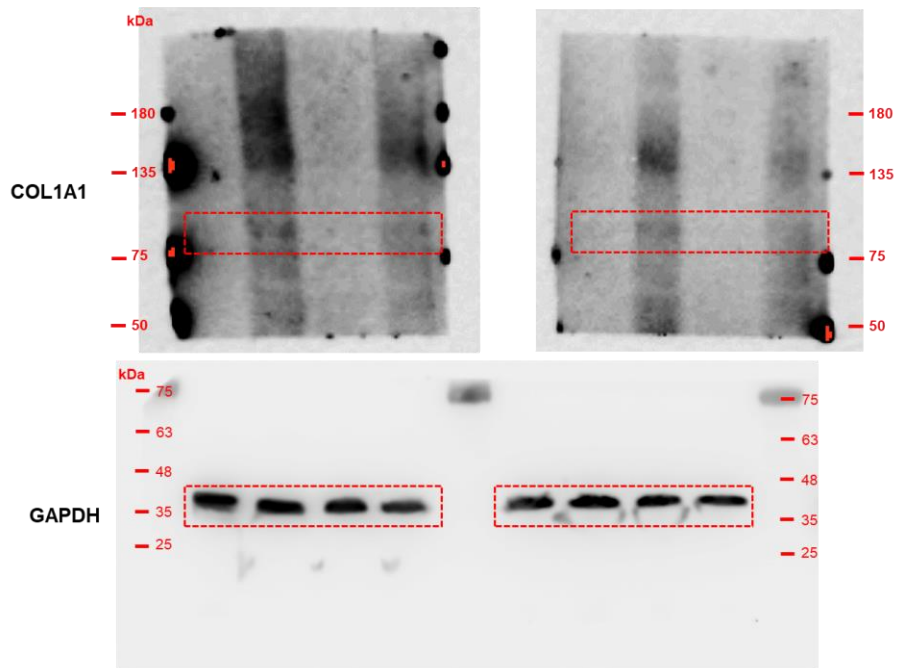

Supplementary Figure 3. Original immunoblotting data for Fig. 3H

Suppl. Fig. 4

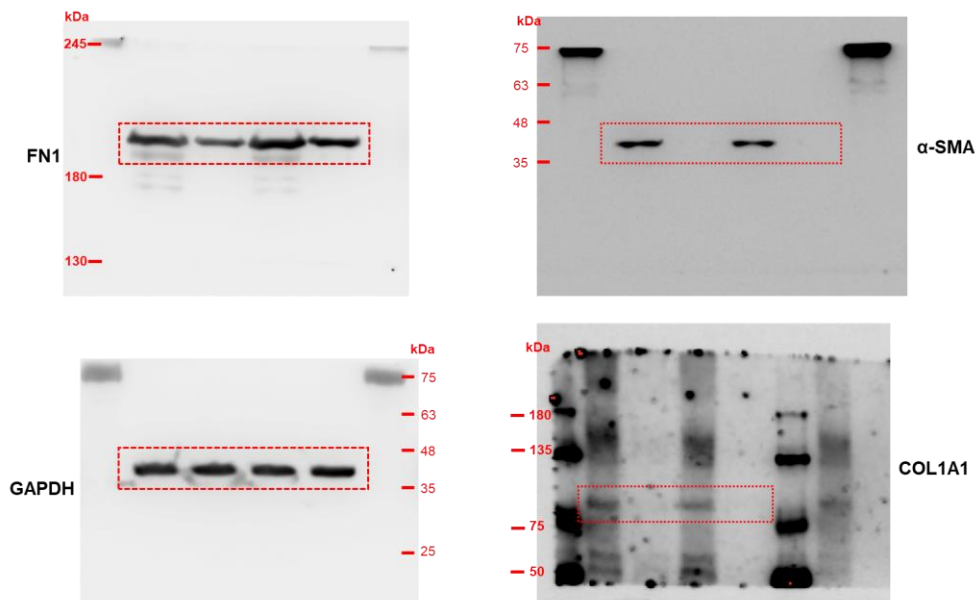

Supplementary Figure 4. Original immunoblotting data for Fig. 4C

Suppl. Fig. 5

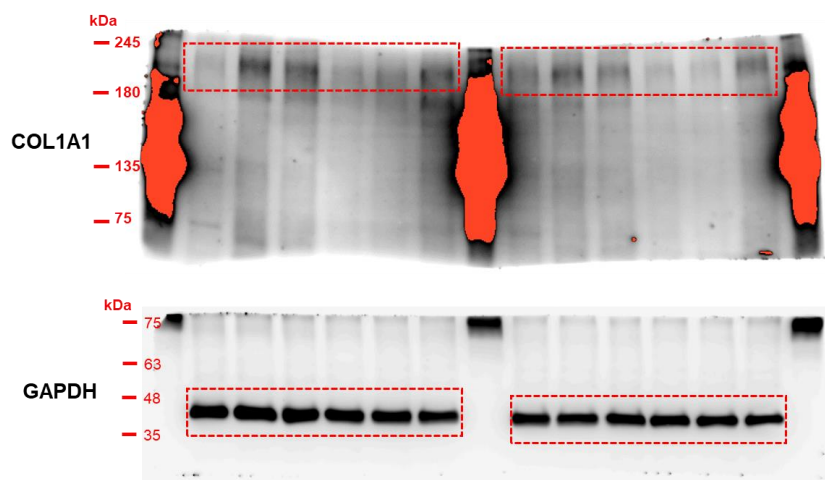

Supplementary Figure 5. Original immunoblotting data for Fig. 6C
